# Supplementary material for: Treated Greywater Reuse for Hydroponic Lettuce Production in a Green Wall System &ndash; Quantitative Health Risk Assessment
Source: Preprints.org preprint supplement (doi:10.20944/preprints201705.0068.v1), 2017-05-08
Supplement: Supplementary file 1 [file supplementary]

Supplementary Materials

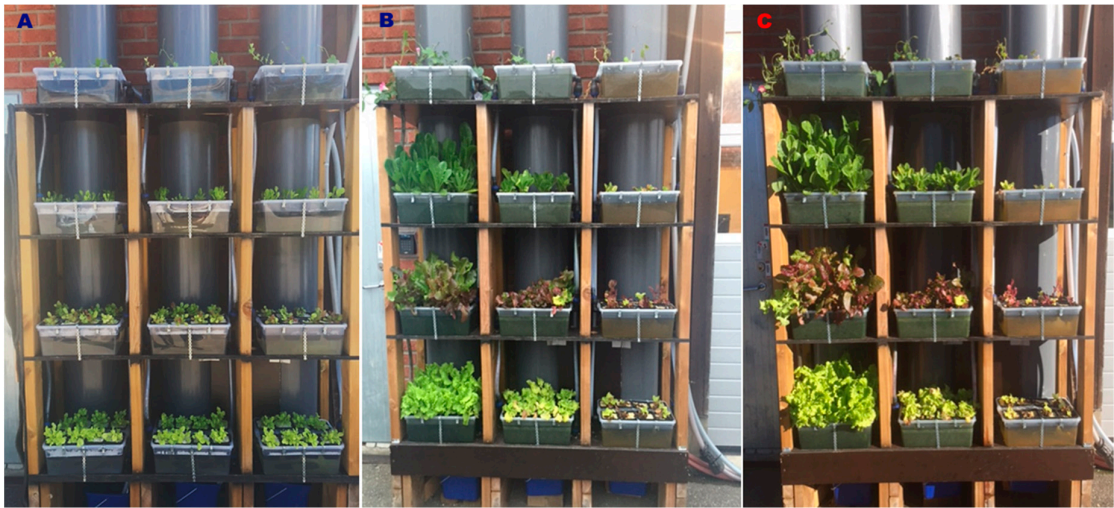

Figure S1. The appearance of lettuce at different growth stage, A. after three weeks of planting, B. after six weeks of planting, and C. after eight weeks of planting, the left column is treated greywater with (0.3% - 0.6% urine), the middle column is with (0.15% - 0.3% urine), and the right column is without urine for each growth stage

Table S1. Health risk characterizing computational equations

| Risk characteristics                                              | Computational equations                                                                   |
|-------------------------------------------------------------------|-------------------------------------------------------------------------------------------|
| Yearly probability of infection (assuming frequency per year)     | $P_{\text{inff/year}} = 1 - (1 - P_{\text{inff/event}})^{\text{frequency per year}}$      |
| Risk of illness from a single exposure                            | $P_{\text{illness/exposure}} = P_{\text{illness/inff}} * P_{\text{inff}}$                 |
| Yearly risk of illness (assuming $x$ exposure frequency per year) | $P_{\text{ill/year}} = 1 - (1 - P_{\text{illness/exposure}})^{\text{frequency per year}}$ |

Table S2. The average concentration of pathogens in the sewage system assuming 1% of sewage present in the greywater considering *E. coli* as a surrogate for faecal contamination

| Microbial pathogens and indicator | Unit              | Average concentration in the sewage system <sup>a</sup> | Pathogen concentration in graywater       |
|-----------------------------------|-------------------|---------------------------------------------------------|-------------------------------------------|
| <i>Cryptosporidium</i>            | oocysts/100ml     | 678.1                                                   | 6.8                                       |
| <i>Campylobacter</i>              | MPN/100ml         | 118                                                     | 1.18                                      |
| Norovirus                         | gene copies/100ml | $5.1 \times 10^4$                                       | 5100 (Assume 0.1 % infective virus = 5.1) |

<sup>a</sup> Pathogen concentration in the sewage depend on literature value [40-42].

Table S3. The proportion of essential plant nutrient uptake by lettuce variety

| Urine in<br>irrigation<br>water (%) | Lettuce Variety                            | Total C<br>(%) | Total N<br>(%) | Total P<br>(%) | Total K<br>(%) | C-N<br>ratio |
|-------------------------------------|--------------------------------------------|----------------|----------------|----------------|----------------|--------------|
| 0.3 - 0.6                           | <i>Lactuca sativa</i> 'Lobjoits Green Cos' | 42,20          | 4,27           | 0,33           | 3,10           | 9,87         |
|                                     | <i>Lactuca sativa</i> 'Red Salad Bowl'     | 41,40          | 4,59           | 0,36           | 3,20           | 9,02         |
|                                     | <i>Lactuca sativa</i> 'Australische Gele'  | 39,90          | 4,94           | 0,39           | 4,20           | 8,08         |
| 0.15 - 0.3                          | <i>Lactuca sativa</i> 'Lobjoits Green Cos' | 41,90          | 4,55           | 0,35           | 3,70           | 9,21         |
|                                     | <i>Lactuca sativa</i> 'Red Salad Bowl'     | 42,50          | 3,74           | 0,26           | 2,80           | 11,37        |
|                                     | <i>Lactuca sativa</i> 'Australische Gele'  | 40,50          | 3,91           | 0,36           | 3,80           | 10,37        |
| 0                                   | <i>Lactuca sativa</i> 'Lobjoits Green Cos' | 43,10          | 1,00           | 0,12           | 0,83           | 43,28        |
|                                     | <i>Lactuca sativa</i> 'Red Salad Bowl'     | 42,90          | 0,99           | 0,18           | 1,10           | 43,15        |
|                                     | <i>Lactuca sativa</i> 'Australische Gele'  | 43,10          | 1,37           | 0,25           | 1,20           | 31,53        |
